# Supplementary material for: Fitness benefits and costs of shelters to the sea urchin Glyptocidaris crenularis
Source: PeerJ. 2020 Apr 20;8:e8886. doi: 10.7717/peerj.8886 (PMC7179571; doi:10.7717/peerj.8886)
Supplement: Supplemental Information 1 [file peerj-08-8886-s001.xlsx]

## Sheet: number of lantern reflex cycles
		Number of lantern reflex cycles
Treatment	No	times/minutes
Group without shelters	1	2.2
	2	4.2
	3	4.2
	4	3
Group with shelters	1	2.8
	2	1.8
	3	1.2
	4	1.6
