# Supplementary material for: Fitness benefits and costs of shelters to the sea urchin Glyptocidaris crenularis
Source: PeerJ. 2020 Apr 20;8:e8886. doi: 10.7717/peerj.8886 (PMC7179571; doi:10.7717/peerj.8886)
Supplement: Supplemental Information 4 [file peerj-08-8886-s004.xlsx]

## Sheet: Sheet1
Covering behavior
Treatment	No	Time to first covering (s)	Number of shells used for covering	Covered areas of sea urchins (cm2)	Percentage of coverd areas (%)
Group without shelters	1	81	4	15.046	39.436
	2	256	2	8.172	17.9743
	3	0	0	0	0
	4	0	0	0	0
	5	656	1	2.9	6.60276
Group with shelters	1	190	5	19.322	60.3417
	2	1287	2	6.987	27.6592
	3	269	4	11.47	26.5282
	4	492	1	2.93	9.12289
	5	559	3	9.07	27.9653
