# Supplementary material for: Fitness benefits and costs of shelters to the sea urchin Glyptocidaris crenularis
Source: PeerJ. 2020 Apr 20;8:e8886. doi: 10.7717/peerj.8886 (PMC7179571; doi:10.7717/peerj.8886)
Supplement: Supplemental Information 5 [file peerj-08-8886-s005.xlsx]

## Sheet: Sheet1
Righting behavior
Treatment	No	Righting time (s)
Group without shelters	1	232
	2	600
	3	212
	4	234
	5	92
Group with shelters	1	336
	2	356
	3	169
	4	600
	5	600
