# Supplementary material for: Fitness benefits and costs of shelters to the sea urchin Glyptocidaris crenularis
Source: PeerJ. 2020 Apr 20;8:e8886. doi: 10.7717/peerj.8886 (PMC7179571; doi:10.7717/peerj.8886)
Supplement: Supplemental Information 6 [file peerj-08-8886-s006.xlsx]

## Sheet: body measurements
Treatment	No	Test diameter	Test height	Test height: test diameter	Wet body weight	Gut weight	Gonad weight	Lantern length	Lantern weight	Test weight	Test thickness 1	Test thickness 2	Test thickness 3	Test thickness 4	Test thickness 5	Average test thickness
Group without shelters	1	69.69	33.72	0.483857	106.88	1.9	1.1	19.04	3	41.8	1.14	1.12	1.22	1.14	1.11	1.146
	2	70.46	34.48	0.489356	108.02	2.3	2.65	17.29	3.08	41.37	1.4	1.05	1.24	1.32	1.77	1.356
	3	61.84	35.18	0.568887	82.06	1.5	1.6	18.78	2.48	29.9	1.15	1.14	0.85	1.29	0.86	1.058
	4	64.78	38.48	0.59401	90.57	1.8	2	18.77	2.9	35.4	1.51	1.05	1.29	1.24	1.68	1.354
	5	65.62	39.44	0.601036	91.59	1.96	1.07	18.17	2.6	33.28	1.58	1.52	1.34	1.16	1.18	1.356
Group with shelters	1	61.5	32.79	0.533171	71.57	1.54	3.41	16.83	2.18	26.96	1.07	1.08	1.08	1.09	1.07	1.078
	2	54.01	29.44	0.545084	49.25	1	2	16.22	2.2	19.2	1.09	1.17	1.14	1.03	1.02	1.09
	3	65.47	37.71	0.575989	95.04	2.1	2.8	16.95	2.6	37	1.38	1.11	1.02	1.14	1.12	1.154
	4	60.99	32.65	0.535334	66.16	0.4	0.2	15.77	1.9	19.1	1.28	1.11	1.23	1.61	1.32	1.31
	5	58.77	32.64	0.555385	65.92	0.2	0.7	16.72	1.9	19.8	1.5	1.34	1.34	1.29	1.55	1.404
